# Supplementary material
Source: MDPI journal article supplement (https://www.mdpi.com/2073-4433/12/4/440)
Supplement: s1 [file s1]

## Supplementary Materials

**Submitted to:** Atmosphere

**Title:** Quantifying air pollutant emission from agricultural machinery using surveys - a case study in Anhui, China

**Authors:** Yi Ai, Yunshan Ge, Zheng Ran, Xueyao Li, Zhibing Xu, Yangfan Chen, Xifeng Miao, Xiaohong Xu, Hongjun Mao, Zongbo Shi, Taosheng Jin

**Table and Figure captions:**

**Table S1** Questionnaire.

**Table S2** Numbers of questionnaire.

**Figure S1.** Total and diesel power of agricultural machinery in Anhui from 2002 to 2015 (AAMN, 2018).

Table S1 Questionnaire

| Name of agricultural machinery<br>Power (kW) | Purchase time and use instruction | Average volume of refueling (litres) (or refueling costs) | Average time for each refueling (hours) | Total fuel consumption (liters) (or total refueling times) |
|----------------------------------------------|-----------------------------------|-----------------------------------------------------------|-----------------------------------------|------------------------------------------------------------|
|                                              |                                   | Busy season:                                              | Busy season:                            | Busy season:                                               |
|                                              |                                   | Slack season:                                             | Slack season:                           | Slack season:                                              |
|                                              |                                   | Busy season:                                              | Busy season:                            | Busy season:                                               |
|                                              |                                   | Slack season:                                             | Slack season:                           | Slack season:                                              |
|                                              |                                   | Busy season:                                              | Busy season:                            | Busy season:                                               |
|                                              |                                   | Slack season:                                             | Slack season:                           | Slack season:                                              |
|                                              |                                   | Busy season:                                              | Busy season:                            | Busy season:                                               |
|                                              |                                   | Slack season:                                             | Slack season:                           | Slack season:                                              |

Table S2 Numbers of questionnaire

| City       | Distributed samples | Valid samples |
|------------|---------------------|---------------|
| Hefei      | 50                  | 31            |
| Wuhu       | 10                  | 3             |
| Ma' anshan | 10                  | 2             |
| Chizhou    | 35                  | 21            |

|           |    |    |
|-----------|----|----|
| Lu' an    | 10 | 2  |
| Anqing    | 50 | 36 |
| Tongling  | 10 | 0  |
| Xuancheng | 10 | 0  |
| Bozhou    | 35 | 20 |
| Fuyang    | 10 | 3  |
| Huaibei   | 10 | 0  |
| Chuzhou   | 40 | 23 |
| Huainan   | 25 | 8  |
| Suzhou    | 10 | 3  |
| Bengbu    | 15 | 6  |
| Huangshan | 20 | 8  |

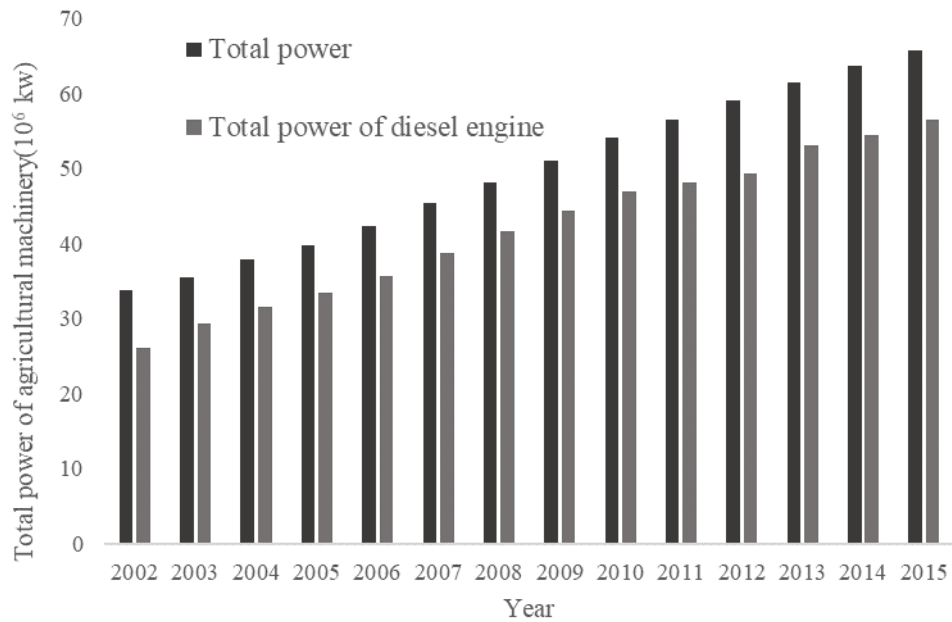

Figure S1. Total and diesel power of agricultural machinery in Anhui from 2002 to 2015 (AAMN, 2018)
